# Supplementary material
Source: PubMed Central journal article supplement (PMC2909330)
Supplement: NIHMS201251-supplement-08.pdf [file NIHMS201251-supplement-08.pdf]

## Supplementary Data

### Supplementary Figure Legends

#### **Figure S1. Mammalian and zebrafish KLF6/Copeb protein sequences are highly homologous.**

(a). Alignment of human, mouse and zebrafish KLF6/Copeb protein sequences compared to the *similar to kruppel like factor 6* (official gene name *si:dkeyp-12a9.2*). There is 75% identity between the human and zebrafish KLF6/Copeb proteins. Only 54% identity is seen between zebrafish Copeb and the related protein encoded by *si:dkeyp-12a9.2* (called “similar to klf6” in figure). \* indicates identical amino acids and : indicates isoelectric amino acids. Blue boxes delineate the C2H2 zinc finger DNA binding domains. (b) Phylogram demonstrates that Copeb is closely related to mammalian KLF6.

#### **Figure S2. *copeb* ATG morpholino injection induces early embryonic lethality in few embryos.**

The percent survival of embryos injected with either 2 or 4  $\mu\text{M}$  *copeb* ATG morpholino was normalized to that observed in embryos from the same clutch that were either injected with a control morpholino or were uninjected. No death was observed in any clutches after 1 dpf. Values are averaged from over 300 embryos at each time point from at least 4 clutches. The error bars indicate the standard deviation. Similar results were obtained with the exon 2 splice donor blocking morpholino.

#### **Figure S3. *copeb*-splice blocking morpholino creates a truncated protein due to mis-splicing of zygotic Copeb.**

(a) A *copeb*-splicing morpholino was designed to target the splicing donor site of *copeb* exon 2. (b) RT-PCR was performed on cDNA samples prepared from uninjected control and morphants on 1-4 dpf embryos with a pair of primers on exons 2 and 3, (*copeb-e2-f* and *copeb-e3-r*, respectively) as indicated by the arrows in (a). (c) The bands generated by the PCR from control and morphant cDNA shown in (c) were sequenced, revealing a 49 bp deletion in the morphant mRNA due to splicing to a cryptic splice donor site in exon 2 (black box). The corresponding base pair of

the *copeb* coding sequence is labeled below the sequencing traces. (d) The product of the mis-spliced mRNA is predicted to be prematurely truncated due to a frame shift, eliminating the C2H2 zinc finger that is essential for Copeb function.

**Figure S4. Restoration of *copeb* rescues the liver and pancreas phenotypes in *copeb* morphants.**

Embryos from *Tg(fabp10:RFP;ela3l:EGFP)* carriers were injected with 2  $\mu$ M *copeb* ATG morpholino, *copeb* mRNA, a combination of the two or uninjected as controls and were scored for viability (a) and any developmental abnormality, termed “affected” (b); n is the total number of embryos scored in all experiments, which were carried out on at least 3 clutches. (c) Live images of representative 4 dpf larvae shows normal size pancreas in control larvae, marked by GFP expression, whereas the liver and pancreas is reduced in larvae injected with either the *copeb* splice donor morpholino or ATG morpholino. The liver and pancreas size is rescued by co-injecting the ATG morpholino with *copeb* mRNA. (d) 4 dpf larvae from *Tg(fabp10:RFP;ela3l:EGFP)* fish were injected with the *copeb* ATG morpholino, *copeb* RNA or both were scored for liver size based on RFP. Total n from 4 clutches is indicated below graph.

**Figure S5. *copeb* morphants have decreased expression of blood cell genes but normal hepatic vasculature .**

(a) mRNA levels of marker genes for mesoderm-derived organ system such as blood and kidney were analyzed using QPCR in control embryos and *copeb* morphants at 4 dpf , and their levels in control embryos were set to be 1. Compared to control embryos, *copeb* morphants exhibited significantly lower expression of genes involved in vasculogenesis and hematopoiesis. However, expression of the kidney marker (*npsh1l*) was not significantly different between control and morphants. Errors bars show standard deviation from three independent experiments; \* indicates  $p < 0.05$ . (b) The *copeb* morpholino was injected into embryos expressing GFP in endothelial cells *Tg(fli1a:EGFP)* were imaged live on 4 dpf. The vascular network is similar in the liver in control (b-c) and *copeb* morphants (d-e). Scale bars = 500 $\mu$ m (b,d) and 100 $\mu$ m (c,e)

**Figure S6. *Klf6*<sup>+/+</sup> ES cells are able to differentiated in to the hepatic lineage using the serum-free hepatic differentiation protocol.** (a) A schematic drawing showing the serum-free hepatic differentiation protocol. *Klf6*<sup>+/+</sup> ES cells were pushed into the hepatic lineage using the serum-free protocol. Expression of marker genes for hepatic differentiation was analyzed in these cells using QPCR from day 0-12. mRNA levels at day 0 were set to be 1. *Klf6* expression exhibited a biphasic increase at day 2 and day 8 (b). Expression of early liver marker *Afp* (c) and *Ttr* (d) could be detected at day 8, while expression of *Albumin*, a later hepatic marker, peaked at day 12 (e).

**Figure S7. *p21* expression does not require *Klf6* in ES cell differentiation cultures.** *Klf6*<sup>-/-</sup> ES cells on days 2-6 of differentiation were analyzed for *p21* expression by qPCR. Expression was normalized to WT cells, averaged over 3 experiments and the error bars display the standard error.

**Table S1. Primer sequences for qPCR****Mouse primers (3'-5')**

|                                  |                          |
|----------------------------------|--------------------------|
| <i>Afp</i> F                     | GCCACCGAGGAGGAAGTG       |
| <i>Afp</i> 2R                    | AGTCTTCTTGCGTGCCAGC      |
| <i>Albumin</i> F                 | GGTGTGTTTCGCCGAGAACGAC   |
| <i>Albumin</i> R                 | GGCGGCAGACTCATCGGC       |
| <i>Cxcr4</i> F                   | CGGGATGAAAACGTCCATTT     |
| <i>Cxcr4</i> R                   | ATGACCAGGATCACCAATCCA    |
| <i>Gata4</i> F                   | GCGGACTCACGGAGATCG       |
| <i>Gata4</i> R                   | CTGCTACACACCCAGGCG       |
| <i>Gapdh</i> F                   | GCCAAAAGGGTCATCATCTC     |
| <i>Gapdh</i> R                   | ATGGCATGGACTGTGGTCAT     |
| <i>Hnf3<math>\beta</math></i> F  | ACTGTAACGGGGGAGGGGC      |
| <i>Hnf3<math>\beta</math></i> R  | CAGTCGGATGGCTCGTGC       |
| <i>Klf6</i> F                    | ACCCGACATGGATGTGCTCCCAAT |
| <i>Klf6</i> R                    | GCAGGGCTCACTCTGAAGATA    |
| <i>Sox17</i> F                   | CAGGAAAACCTCAGCATGTCACC  |
| <i>Sox17</i> R                   | CTTGGGGAAAACCTGGCTGGAG   |
| <i>Ttr</i> F                     | CTCACCCACAGATGAGAAG      |
| <i>Ttr</i> R                     | GGCTGAGTCTCTCAATTC       |
| <b>Zebrafish primers (3'-5')</b> |                          |
| <i>amy</i> F                     | CATCAACCCTGATTCCACCT     |
| <i>amy</i> R                     | GTCCCACCAATTGGAAAATG     |
| <i>ces</i> F                     | AGCGCTCCTTTCACAGAAGA     |
| <i>ces</i> R                     | TTTTCCCAGGTTTCTGTTGC     |
| <i>copeb</i> F                   | CGTCCACGACACTGGC         |
| <i>copeb</i> R                   | GCTCCAAAGATCCTCCTGGC     |
| <i>zcopeb-E2-F</i>               | TCTGACGGAGTCAGCACATCA    |
| <i>zcopeb-E3-R</i>               | GGTTAGCTCATCGCTCCTTG     |
| <i>cyp2E1</i> F                  | TATTCCTCATGCTGCACTCTG    |
| <i>cyp2E1</i> R                  | AGGAGCGTTTACCTGCAGAA     |
| <i>cyp3c1</i> F                  | AAACCCTGATGAGCATGGAC     |
| <i>cyp3c1</i> R                  | CAAGTCTTTGGGGATGAGGA     |
| <i>fabp10</i> F                  | CATTGTGGCTGCAGGTTATG     |
| <i>fabp10</i> R                  | TAATCCTCACATCCCGATCC     |
| <i>hgae2</i> F                   | CTCTGCCCCAGTGAGGAAA      |

|                  |                         |
|------------------|-------------------------|
| <i>hgae2</i> R   | CGAGGATGTTGTGGGACAGA    |
| <i>hpx</i> F     | TAGATGCTGCCTTTGTGTGC    |
| <i>hpx</i> R     | TGGTTCCTTCCTTCACAAGC    |
| <i>ifapb</i> F   | CACCTCCAAAACCTCCTGGAA   |
| <i>ifapb</i> R   | TTCTGCAGACCAGCTTTCCT    |
| <i>insulin</i> F | GCTCTGTTGGTCCTGTTGGT    |
| <i>insulin</i> R | GGGCAGATTTAGGAGGAAGG    |
| <i>kdr</i> F     | GGTGGGACACTCACACTCATTT  |
| <i>kdr</i> R     | TCGCTGGACTTCTTGTGACTG   |
| <i>lcp1</i> F    | GATGGCAGCAGCACAGATC     |
| <i>lcp1</i> R    | CGGCAGAGGGAGATTGGCGGC   |
| <i>mpx</i> F     | TGTTGTGCTCTTTCAGTGGGGG  |
| <i>mpx</i> R     | ACTTGTAAGCAGCGTCTACTATT |
| <i>mtp</i> F     | CTCAGCTGGTGGATGCAGTA    |
| <i>mtp</i> R     | ATCTCTGTGCTGCCGATCTT    |
| <i>npsh11</i> F  | CAGCATGACAGGAGACCAGA    |
| <i>npsh11</i> R  | GCTGTGAAGAAGGGATCTGC    |
| <i>rppo</i> F    | CTGAACATCTCGCCCTTCTC    |
| <i>rppo</i> R    | TAGCCGATCTGCAGACACAC    |
| <i>tfa</i> F     | TGCAGAAAAAGCTGGTGATG    |
| <i>tfa</i> R     | ACAGCATGAACTGGCACTTG    |
| <i>try</i> F     | CCCTCACCCGAAATACAATG    |
| <i>try</i> R     | GAAACCAAGCACTGCTCTCC    |
